# Supplementary material for: A Context-Aware-Based Audio Guidance System for Blind People Using a Multimodal Profile Model
Source: MDPI journal article supplement (doi:10.3390/s141018670), 2014-10-09
Supplement: s1 [file s1]

*Supplementary Information***A Context-Aware-Based Audio Guidance System for Blind People Using a Multimodal Profile Model. *Sensors* 2014, 14, 18670-18700****Qing Lin and Youngjoon Han \***

Electronic Engineering Department, Soongsil University, 511 Sangdo-Dong, Dongjak-Gu, Seoul 156-743, Korea; E-Mail: lqsdust@163.com

\* Author to whom correspondence should be addressed; E-Mail: young@ssu.ac.kr; Tel.: +82-02-820-0699.

**1. Fuzzy Rules Used in the Fuzzy Inference Model****Table S1.** Fuzzy rules definition.

| No. | $\rho$ | d      | $\phi$ | v      | c      |
|-----|--------|--------|--------|--------|--------|
| 1   | low    | near   | small  | slow   | normal |
| 2   | low    | near   | small  | medium | danger |
| 3   | low    | near   | small  | fast   | danger |
| 4   | low    | near   | medium | slow   | normal |
| 5   | low    | near   | medium | medium | danger |
| 6   | low    | near   | medium | Fast   | danger |
| 7   | low    | near   | large  | any    | danger |
| 8   | low    | medium | small  | slow   | safe   |
| 9   | low    | medium | small  | medium | safe   |
| 10  | low    | medium | small  | fast   | normal |
| 11  | low    | medium | medium | slow   | normal |
| 12  | low    | medium | medium | medium | normal |
| 13  | low    | medium | medium | fast   | danger |
| 14  | low    | medium | large  | slow   | normal |
| 15  | low    | medium | large  | medium | danger |
| No. | $\rho$ | d      | $\phi$ | v      | c      |
| 16  | low    | medium | large  | fast   | danger |
| 17  | low    | far    | small  | any    | safe   |
| 18  | low    | far    | medium | slow   | normal |
| 19  | low    | far    | medium | medium | normal |
| 20  | low    | far    | medium | fast   | danger |

**Table S1. Cont.**

| <b>No.</b> | <b><math>\rho</math></b> | <b>d</b> | <b><math>\phi</math></b> | <b>v</b> | <b>c</b> |
|------------|--------------------------|----------|--------------------------|----------|----------|
| 21         | low                      | far      | large                    | slow     | normal   |
| 22         | low                      | far      | large                    | medium   | normal   |
| 23         | low                      | far      | large                    | fast     | danger   |
| 24         | medium                   | near     | small                    | slow     | normal   |
| 25         | medium                   | near     | small                    | medium   | normal   |
| 26         | medium                   | near     | small                    | fast     | danger   |
| 27         | medium                   | near     | medium                   | any      | danger   |
| 28         | medium                   | near     | larger                   | any      | danger   |
| 29         | medium                   | medium   | small                    | any      | normal   |
| 30         | medium                   | medium   | medium                   | slow     | normal   |
| 31         | medium                   | medium   | medium                   | medium   | normal   |
| 32         | medium                   | medium   | medium                   | fast     | danger   |
| 33         | medium                   | medium   | larger                   | slow     | normal   |
| 34         | medium                   | medium   | larger                   | medium   | danger   |
| 35         | medium                   | medium   | larger                   | fast     | danger   |
| 36         | medium                   | far      | small                    | slow     | safe     |
| 37         | medium                   | far      | small                    | medium   | safe     |
| 38         | medium                   | far      | small                    | fast     | normal   |
| 39         | medium                   | far      | medium                   | any      | normal   |
| 40         | medium                   | far      | large                    | slow     | normal   |
| 41         | medium                   | far      | large                    | medium   | normal   |
| 42         | medium                   | far      | large                    | fast     | danger   |
| 43         | high                     | near     | small                    | slow     | normal   |
| 44         | high                     | near     | small                    | medium   | danger   |
| 45         | high                     | near     | small                    | fast     | danger   |
| 46         | high                     | near     | medium                   | any      | danger   |
| No.        | $\rho$                   | d        | $\phi$                   | v        | c        |
| 47         | high                     | near     | large                    | any      | danger   |
| 48         | high                     | medium   | small                    | any      | normal   |
| 49         | high                     | medium   | medium                   | slow     | normal   |
| 50         | high                     | medium   | medium                   | medium   | danger   |
| 51         | high                     | medium   | medium                   | fast     | danger   |
| 52         | high                     | medium   | large                    | any      | danger   |
| 53         | high                     | far      | small                    | slow     | safe     |
| 54         | high                     | far      | small                    | medium   | normal   |
| 55         | high                     | far      | small                    | fast     | normal   |
| 56         | high                     | far      | medium                   | slow     | safe     |
| 57         | high                     | far      | medium                   | medium   | normal   |
| 58         | high                     | far      | medium                   | fast     | normal   |
| 59         | high                     | far      | large                    | slow     | normal   |
| 60         | high                     | far      | large                    | medium   | normal   |
| 61         | high                     | far      | large                    | fast     | danger   |

## 2. A Fuzzy Inference Process for Walking Context

**Figure S1.** An example of fuzzy inference process.

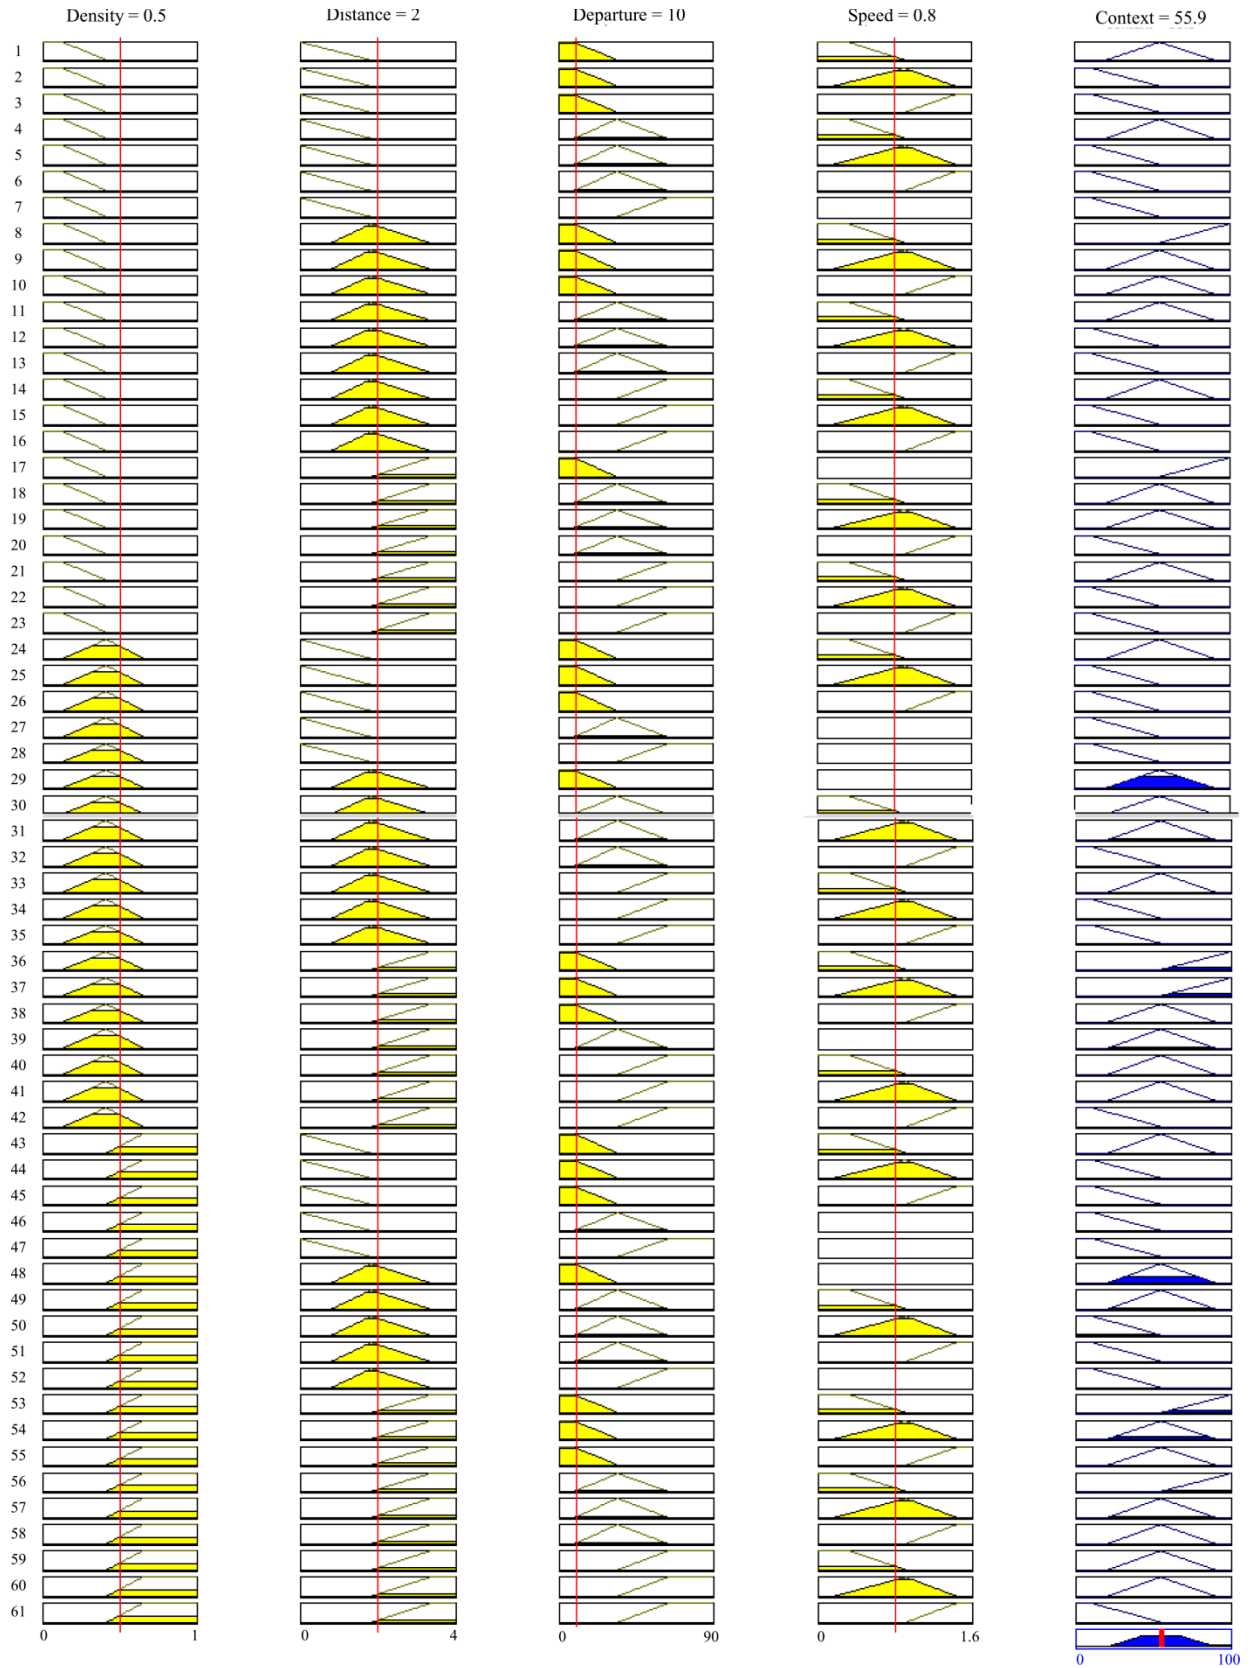

### 3. Walking Context Fuzzy Inference Solution Space

**Figure S2.** Fuzzy inference solution space.

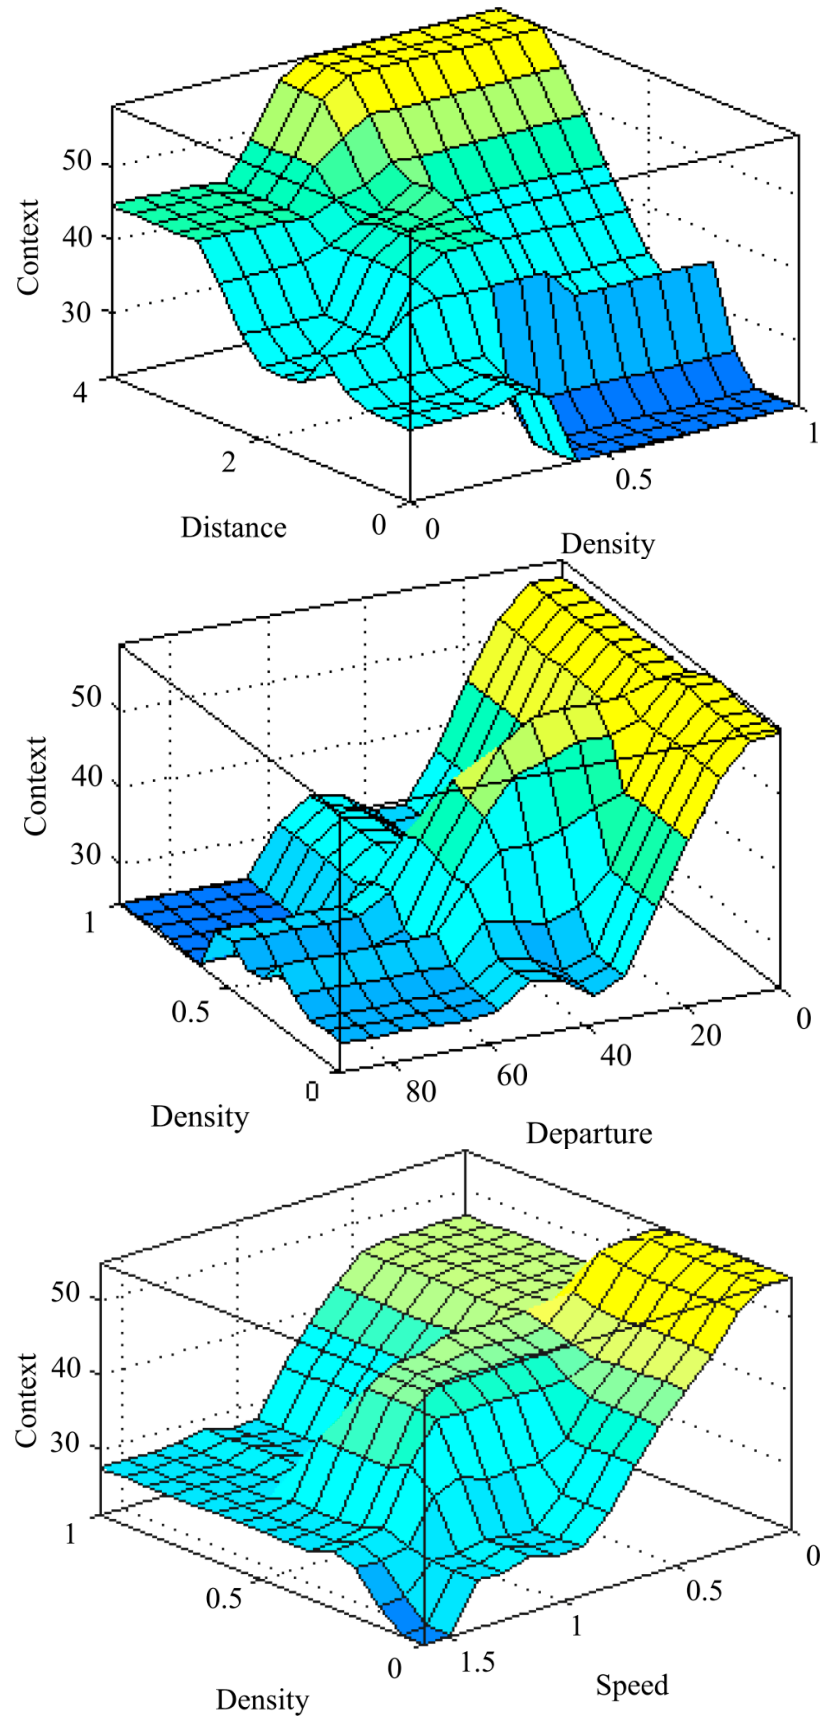

**Figure S2. Cont.**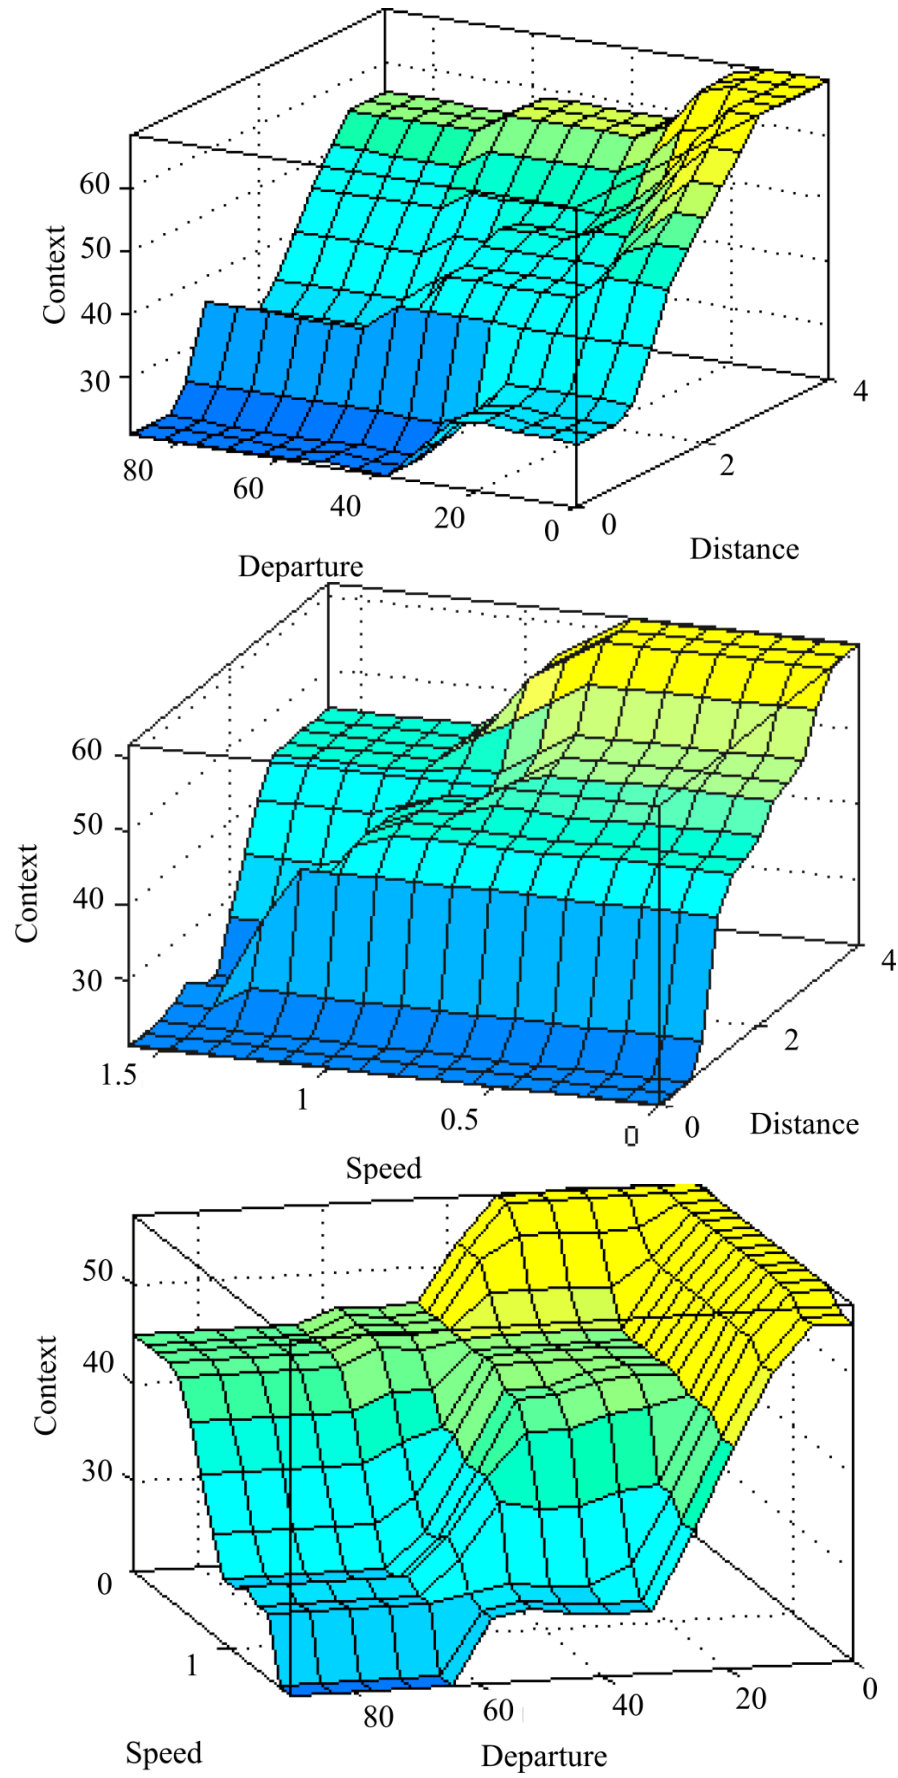

#### 4. Acoustic Beeper Message Definition

**Figure S3.** Beeper message definition using polar array.

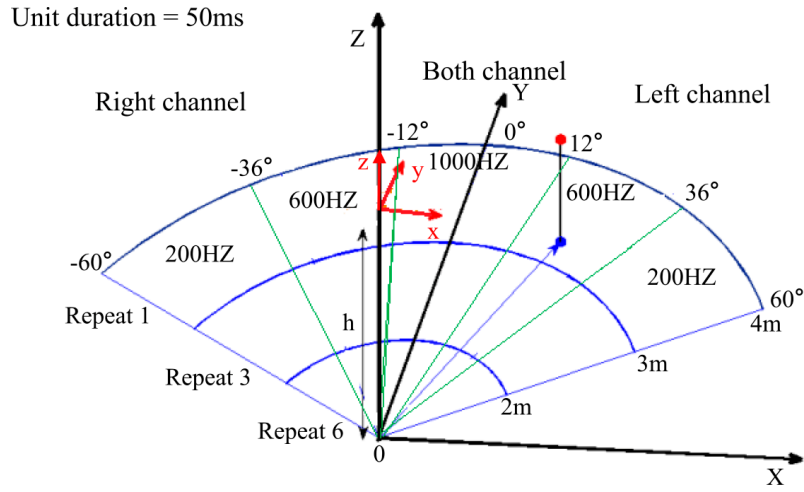

**Table S2.** Beeper message definition in different polar zones.

|                            | <2 m                                                  | 2 m ~ 3 m                                             | 3 m ~ 4 m                                             |
|----------------------------|-------------------------------------------------------|-------------------------------------------------------|-------------------------------------------------------|
| -12° ~ 12°<br>Center Zone  | F = 1000 HZ, L = 50 ms,<br>Repeat = 6, Channel = both | F = 1000 HZ, L = 50 ms,<br>Repeat = 3, Channel = both | F = 1000 HZ, L = 50 ms,<br>Repeat = 1, Channel = both |
| 12° ~ 36°<br>Right-1 Zone  | F = 600 HZ, L = 50 ms,<br>Repeat = 6, Channel = right | F = 600 HZ, L = 50 ms,<br>Repeat = 3, Channel = right | F = 600 HZ, L = 50 ms,<br>Repeat = 1, Channel = right |
| 36° ~ 60°<br>Right-2 Zone  | F = 200 HZ, L = 50 ms,<br>Repeat = 6, Channel = right | F = 200 HZ, L = 50 ms,<br>Repeat = 3, Channel = right | F = 200 HZ, L = 50 ms,<br>Repeat = 1, Channel = right |
| -12° ~ -36°<br>Left-1 Zone | F = 600 HZ, L = 50 ms,<br>Repeat = 6, Channel = left  | F = 600 HZ, L = 50 ms,<br>Repeat = 3, Channel = left  | F = 600 HZ, L = 50 ms,<br>Repeat = 1, Channel = left  |
| -36° ~ -60°<br>Left-2 Zone | F = 200 HZ, L = 50 ms,<br>Repeat = 6, Channel = left  | F = 200 HZ, L = 50 ms,<br>Repeat = 3, Channel = left  | F = 200 HZ, L = 50 ms,<br>Repeat = 1, Channel = left  |

#### 5. Guidance System Output

**Figure S4.** System output in image domain.

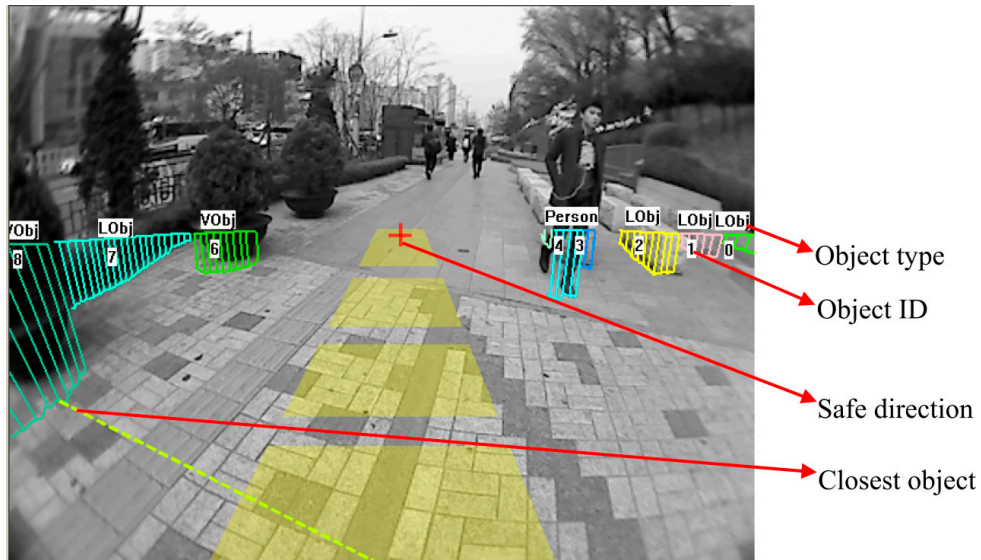

**Figure S5.** System output in laser domain.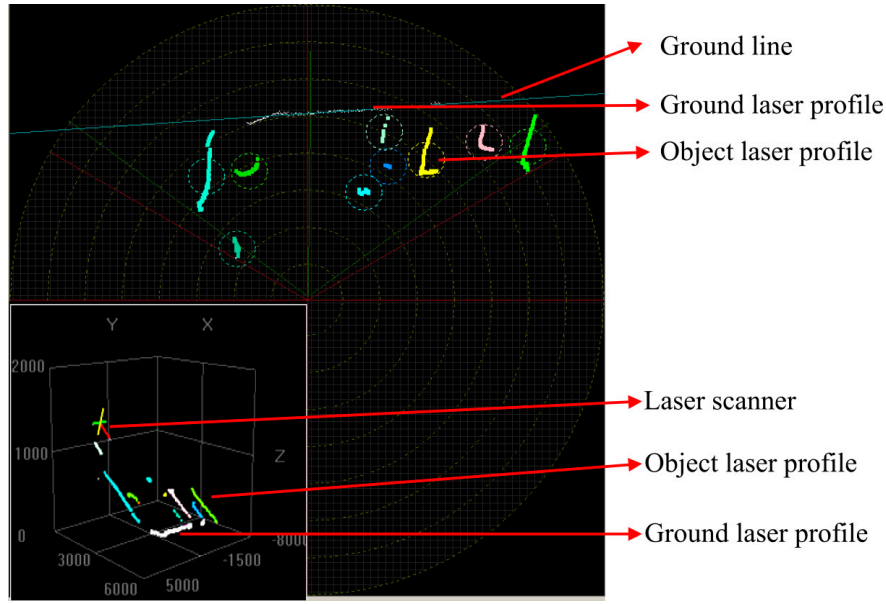

Please refer to: <http://youtu.be/c5AcJhNXgj0> for a demo video of the system.

## 6. System Prototype

**Figure S6.** Prototype system.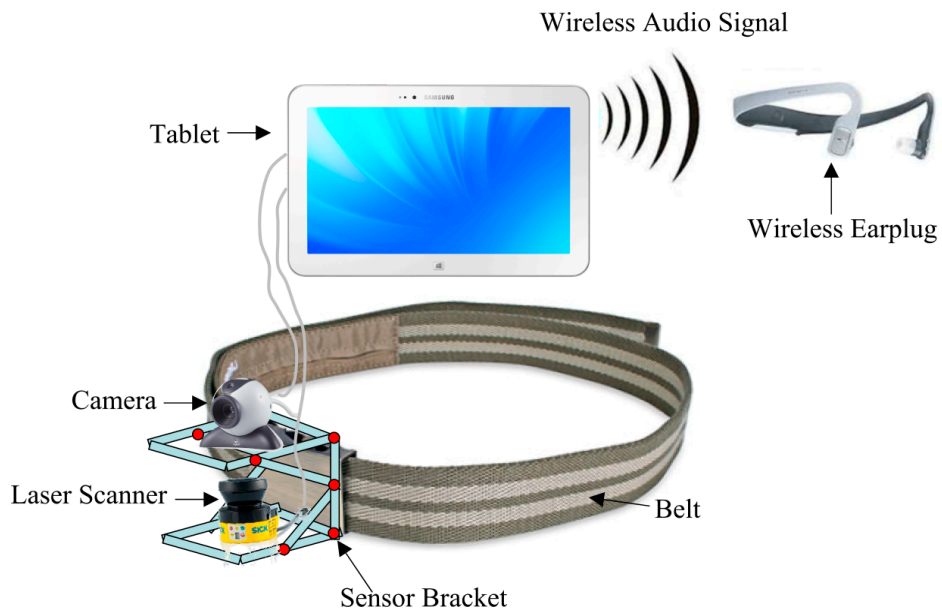**Table S3.** Prototype system specification.

| Prototype Part           | Size (L × W × H) mm | Weight |
|--------------------------|---------------------|--------|
| HOKUYO URG laser scanner | 50 × 50 × 70        | 160 g  |
| Microsoft LifeCam VX-800 | 52 × 52 × 62        | 68 g   |
| Sensor bracket           | 60 × 60 × 80        | 105 g  |
| Samsung ATIV Tab 3       | 257.4 × 165.3 × 8.2 | 550 g  |
| Iwoo Sports Headset      | Adjustable to head  | 60 g   |
| Total                    |                     | 943 g  |

As shown in Figure S6, the prototype system is built as a wearable belt. Camera and laser scanner are mounted on a sensor bracket attached to the belt. The camera and laser scanner are connected to a tablet PC via USB cables. The generated audio messages are forwarded to the user via a wireless earplug. The weight and size of each part of the prototype system are listed in Table S3. The total weight is less than 1 kg.

For power consumption, both the webcam and laser scanner draw power via USB cable from the tablet PC. Samsung ATIV Tab 3 comes with a built-in 2 cell battery capable of offering 25.6 Wh power. The specification of Samsung ATIV Tab 3 is listed in Table S4, and the power consumption of major parts is listed in Table S5. When running the system algorithm on a full working load, the whole system consumes about 8.6 W, and when system is in standby mode, it only consumes 2.2 W.

**Table S4.** Samsung ATIV Tab 3 Specification.

| Tablet Part | Specification                                           |
|-------------|---------------------------------------------------------|
| CPU/Chipset | Intel® ATOM™ Processor Z2760<br>(1.8 GHz, 1MB L2 Cache) |
| Memory      | 2 GB LPDDR2 System Memory at 800 MHz                    |
| Graphic     | Intel® Graphics Media Accelerator                       |
| Storage     | 64 GB eMMC iNAND™ Embedded Flash Drive                  |
| Display     | 10.1" SuperBright + 400nit HD LED Display (1366 × 768)  |
| Power       | 2 Cell Li-ion Battery (25.6 Wh)                         |

**Table S5.** Power consumption of the prototype system.

| Power Consumption Part | Power Consumption             |
|------------------------|-------------------------------|
| Tablet platform        | 4.5 W(working)/2.2 W(standby) |
| Laser scanner          | 2.5 W                         |
| Webcam                 | 1.6 W                         |
| Total                  | 8.6 W(working)/2.2 W(standby) |

**Figure S7.** System working hours.

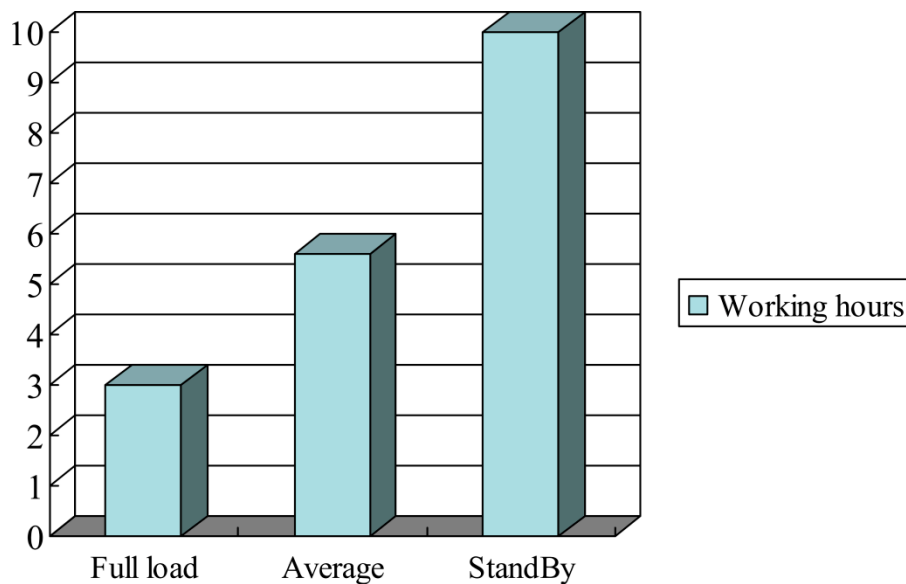



In Figure S7, the working hour of system powered by a 25.6 Wh Li-ion battery is listed. When working on full load, the system can hold for around 3 h. And in standby mode, the system can last for almost 10 h. For an average daily use, the system can sustain about 5~6 h on a full charge.

In addition, we are also making embedded board specially designed for running the application. The specially designed board will have smaller size, less weight and lower power consumption compared with a generally purpose tablet that is used in the prototype system.

© 2014 by the authors; licensee MDPI, Basel, Switzerland. This article is an open access article distributed under the terms and conditions of the Creative Commons Attribution license (<http://creativecommons.org/licenses/by/4.0/>).
